# Supplementary material
Source: Springer Nature journal article supplement (https://www.springermedizin.de/resource/supplementary/12913_2010_1443_MOESM1_ESM.pdf/9528144)
Supplement: MOESM1 [file 9528144]

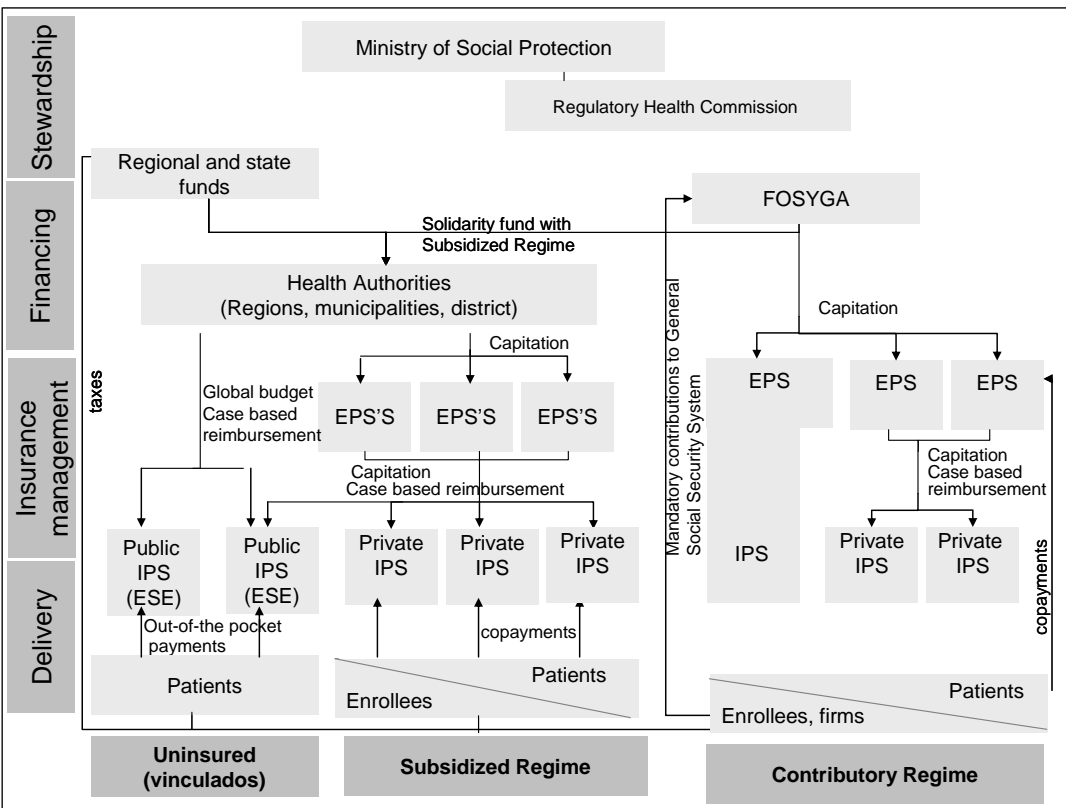

Stewardship

Financing

Insurance management

Delivery

Ministry of Social Protection

Regulatory Health Commission

Regional and state funds

Solidarity fund with Subsidized Regime

Health Authorities (Regions, municipalities, district)

Capitation

EPS'S

EPS'S

EPS'S

Global budget Case based reimbursement

Capitation Case based reimbursement

Public IPS (ESE)

Public IPS (ESE)

Private IPS

Private IPS

Private IPS

Out-of-the pocket payments

copayments

Patients

Enrollees

Patients

Uninsured (vinculados)

Subsidized Regime

Contributory Regime

FOSYGA

Capitation

EPS

EPS

EPS

IPS

Private IPS

Private IPS

Capitation Case based reimbursement

Mandatory contributions to General Social Security System

Enrollees, firms

Patients

copayments

taxes
